# Supplementary material for: Probiotics Bifidobacterium lactis M8 and Lactobacillus rhamnosus M9 prevent high blood pressure via modulating the gut microbiota composition and host metabolic products
Source: PubMed Central journal article supplement (PMC10734487; doi:10.1128/msystems.00331-23), 2023-10-19

**A**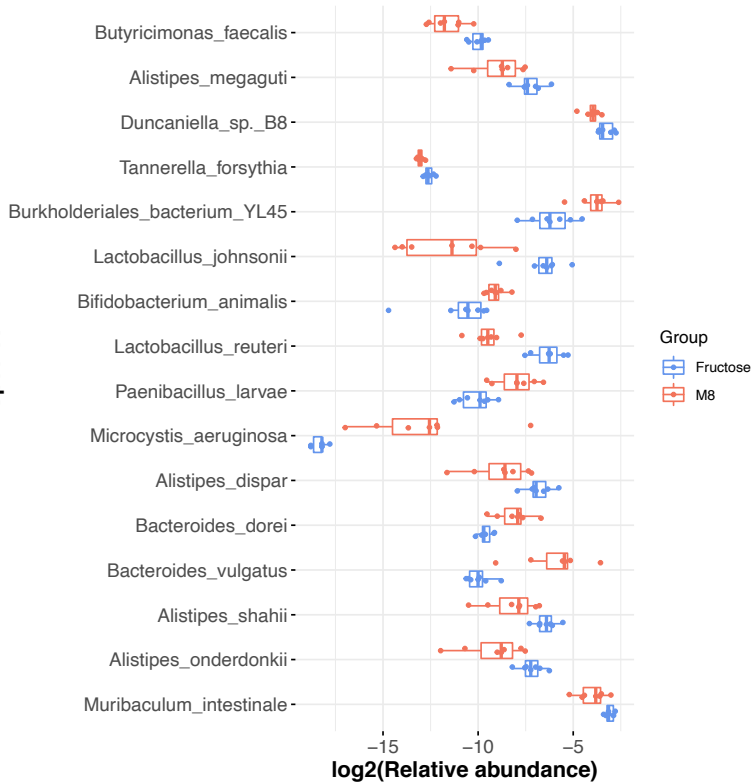**B**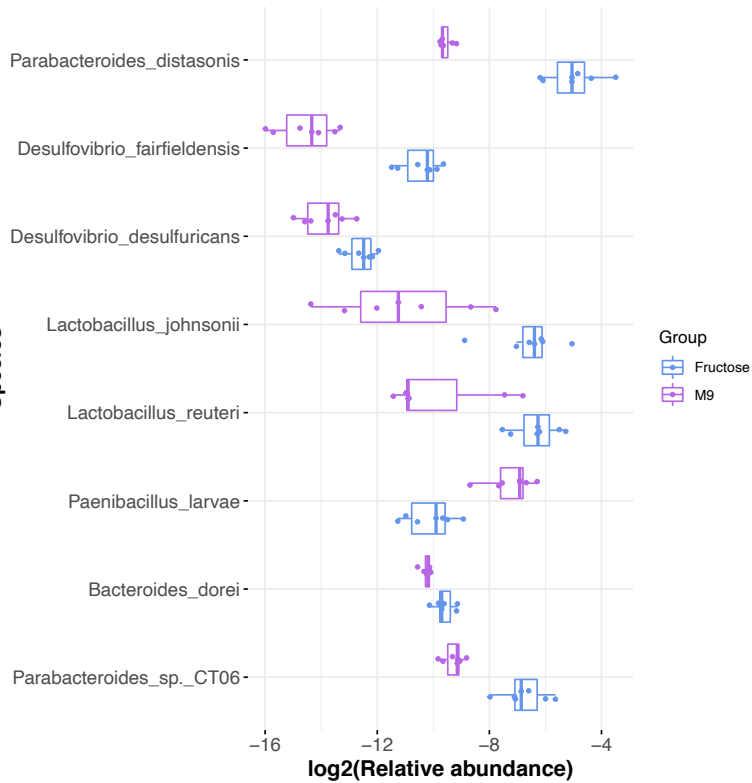

Supplement: msystems.00331-23-s0003.pdf [file msystems.00331-23-s0003.pdf]
